# Supplementary material
Source: PubMed Central journal article supplement (PMC8080356)
Supplement: 12889_2021_10897_MOESM2_ESM.pdf [file 12889_2021_10897_MOESM2_ESM.pdf]

## **SEMI-STRUCTURED INTERVIEW GUIDE**

- 1- Please describe your feelings after a day at work during the COVID-19 pandemic.
- 2- Please describe how satisfied you are with working conditions during the pandemic crisis.
- 3- In your opinion, mention and describe what factors have negatively impacted your work and your work-related satisfaction during the current pandemic.
- 4- In your opinion, mention and describe what factors have motivated you to work during the current pandemic crisis.
- 5- Please describe any procedures or protocols that have been implemented by decision-makers at your institution and/or at the national level to enhance your working conditions during the current pandemic crisis.
- 6- Please describe how did lockdown and curfew policy in Jordan impact your medical practice, as well as your personal life? Please provide us with detailed experiences.
